# Supplementary material for: The Assessment of Fear of COVID-19 among the Elderly Population: A Cross-Sectional Study
Source: MDPI journal article supplement (doi:10.3390/jcm10235537), 2021-11-26
Supplement: s1 [file s1]

Table S1. Sociodemographic data of all surveyed respondents

| Feature (variable)                           | Statistical data |
|----------------------------------------------|------------------|
| Gender                                       |                  |
| Female                                       | 290 (58.0%)      |
| Male                                         | 210 (42.0%)      |
| Age                                          |                  |
| 60 – 64                                      | 141 (28.2%)      |
| 65 - 69                                      | 128 (25.6%)      |
| 70 and more                                  | 231 (46.2%)      |
| Place of residence                           |                  |
| Village                                      | 110 (22.0%)      |
| Town, less than 20,000 inhabitants           | 56 (11.2%)       |
| Town, between 20,000 to 100,000 inhabitants  | 136 (27.2%)      |
| Town, between 100,000 to 200,000 inhabitants | 62 (12.4%)       |
| Town, between 200,000 to 400,000 inhabitants | 39 (7.8%)        |
| Town, more than 400,000 inhabitants          | 97 (19.4%)       |
| Housing situation                            |                  |
| Lives alone                                  | 108 (21.6%)      |
| Lives with partner                           | 202 (40.4%)      |
| Lives with partner and children              | 117 (23.4%)      |
| Lives alone with children                    | 35 (7.0%)        |
| Lives with family                            | 29 (5.8%)        |
| Other situation                              | 9 (1.8%)         |
| Education                                    |                  |
| Primary                                      | 8 (1.6%)         |
| Vocational                                   | 105 (21.0%)      |
| Secondary                                    | 245 (49.0%)      |
| Higher                                       | 142 (28.4%)      |
| BMI (kg/m <sup>2</sup> )                     |                  |
| M ± SD                                       | 27.4 ± 4.6       |
| Me (IQR)                                     | 27 (24-30)       |
| Min - Max                                    | 19 - 46          |
| Household income per person per month        |                  |
| < 500 PLN                                    | 5 (1.0%)         |
| 501 – 1000 PLN                               | 24 (4.8%)        |
| 1001 – 2000 PLN                              | 188 (37.6%)      |
| 2001 – 3000 PLN                              | 158 (31.6%)      |
| More than 3000 PLN                           | 110 (22.0%)      |
| Refusal to answer                            | 15 (3.0%)        |

Table S2. Clinical characteristics of the surveyed respondents

| Feature (variables)                                          | Statistical data |
|--------------------------------------------------------------|------------------|
| Chronic diseases:                                            |                  |
| Coronary Heart Disease                                       | 63 (12.6%)       |
| Diabetes Mellitus                                            | 74 (14.8%)       |
| Asthma                                                       | 43 (8.6%)        |
| COPD                                                         | 33 (6.6%)        |
| Heart Failure                                                | 71 (14.2%)       |
| Kidney Failure                                               | 20 (4.0%)        |
| Gastroesophageal Reflux Disease                              | 68 (13.6%)       |
| Number of drugs taken                                        |                  |
| 1 to 3                                                       | 301 (60.2%)      |
| 4 to 6                                                       | 151 (30.2%)      |
| 7 to 10                                                      | 40 (8.0%)        |
| More than 10                                                 | 8 (1.6%)         |
| Cardiac drugs                                                | 132 (26.4%)      |
| Antihypertensive drugs                                       | 255 (51.0%)      |
| Diuretics                                                    | 78 (15.6%)       |
| Analgesics                                                   | 230 (46.0%)      |
| Digestive ailments drugs                                     | 131 (26.2%)      |
| Anticoagulants                                               | 87 (17.4%)       |
| Antidepressants                                              | 78 (15.6%)       |
| Nootropics                                                   | 54 (10.8%)       |
| All drugs are prescribed by the same doctor                  | 352 (70.4%)      |
| How many different doctors have prescribed your medications? | N = 148          |
| 2                                                            | 82 (55.4%)       |
| 3                                                            | 52 (35.1%)       |
| 4 and more                                                   | 14 (9.4%)        |

Table S3. Physical characteristics of the surveyed respondents

| Feature (variables)                                       | Statistical data |
|-----------------------------------------------------------|------------------|
| Activities of Daily Living (ADL)                          |                  |
| M $\pm$ SD                                                | 5.9 $\pm$ 0.4    |
| Me (IQR)                                                  | 6 (6-6)          |
| Min - Max                                                 | 2 - 6            |
| Fit people (5 – 6 pts.)                                   | 493 (98.6%)      |
| Moderately disabled people (3 – 4 pts.)                   | 6 (1.2%)         |
| Disabled people (0 – 2 pts.)                              | 1 (0.2%)         |
| The Lawton Instrumental Activities of Daily Living (IADL) |                  |
| M $\pm$ SD                                                | 22.9 $\pm$ 2.3   |
| Me (IQR)                                                  | 24 (23-24)       |
| Min - Max                                                 | 11 - 24          |
| Abbreviated Mental Test Score (AMTS)                      |                  |
| M $\pm$ SD                                                | 9.1 $\pm$ 1.0    |
| Me (IQR)                                                  | 9 (9-10)         |
| Min - Max                                                 | 5 - 10           |
| Normal condition (7–10 pts.)                              | 9.1 $\pm$ 1.0    |
| Moderate disorder (4–6 pts.)                              | 9 (9-10)         |
| Geriatric depression scale (GDS-15)                       |                  |
| M $\pm$ SD                                                | 4.8 $\pm$ 4.0    |
| Me (IQR)                                                  | 4 (2-8)          |
| Min - Max                                                 | 0 - 15           |
| Lack of depression (0–5 pts.)                             | 324 (64.8%)      |
| Depression (6–15 pts.)                                    | 176 (35.2%)      |
| Gastric Anxiety Scale (GAS-10)                            |                  |
| M $\pm$ SD                                                | 7.2 $\pm$ 4.6    |
| Me (IQR)                                                  | 6 (4-10)         |
| Min - Max                                                 | 0 - 25           |
| Lubben Social Network Scale (LSNS-6)                      |                  |
| M $\pm$ SD                                                | 14.2 $\pm$ 5.9   |
| Me (IQR)                                                  | 15 (10-18)       |
| Min - Max                                                 | 0 - 30           |
| Social loneliness scale (Gierveld Scale)                  |                  |
| M $\pm$ SD                                                | 13.1 $\pm$ 1.8   |
| Me (IQR)                                                  | 13 (12-14)       |
| Min - Max                                                 | 6 - 18           |
| Mini Nutritional Assessment (MNA)                         |                  |
| M $\pm$ SD                                                | 12.8 $\pm$ 1.5   |
| Me (IQR)                                                  | 13 (12-14)       |
| Min - Max                                                 | 6 - 14           |
| Proper nutritional status (12–14 pts.)                    | 418 (83.6%)      |
| The danger of malnutrition (8–11 pts.)                    | 78 (15.6%)       |
| Malnutrition (0–7 pts.)                                   | 4 (0.8%)         |
